# Supplementary material for: Inborn errors in RNA polymerase III underlie severe varicella zoster virus infections
Source: JCI journal article supplement (doi:10.1172/jci92280), 2017-08-06
Supplement: sd1 [file 1]

Supplemental material

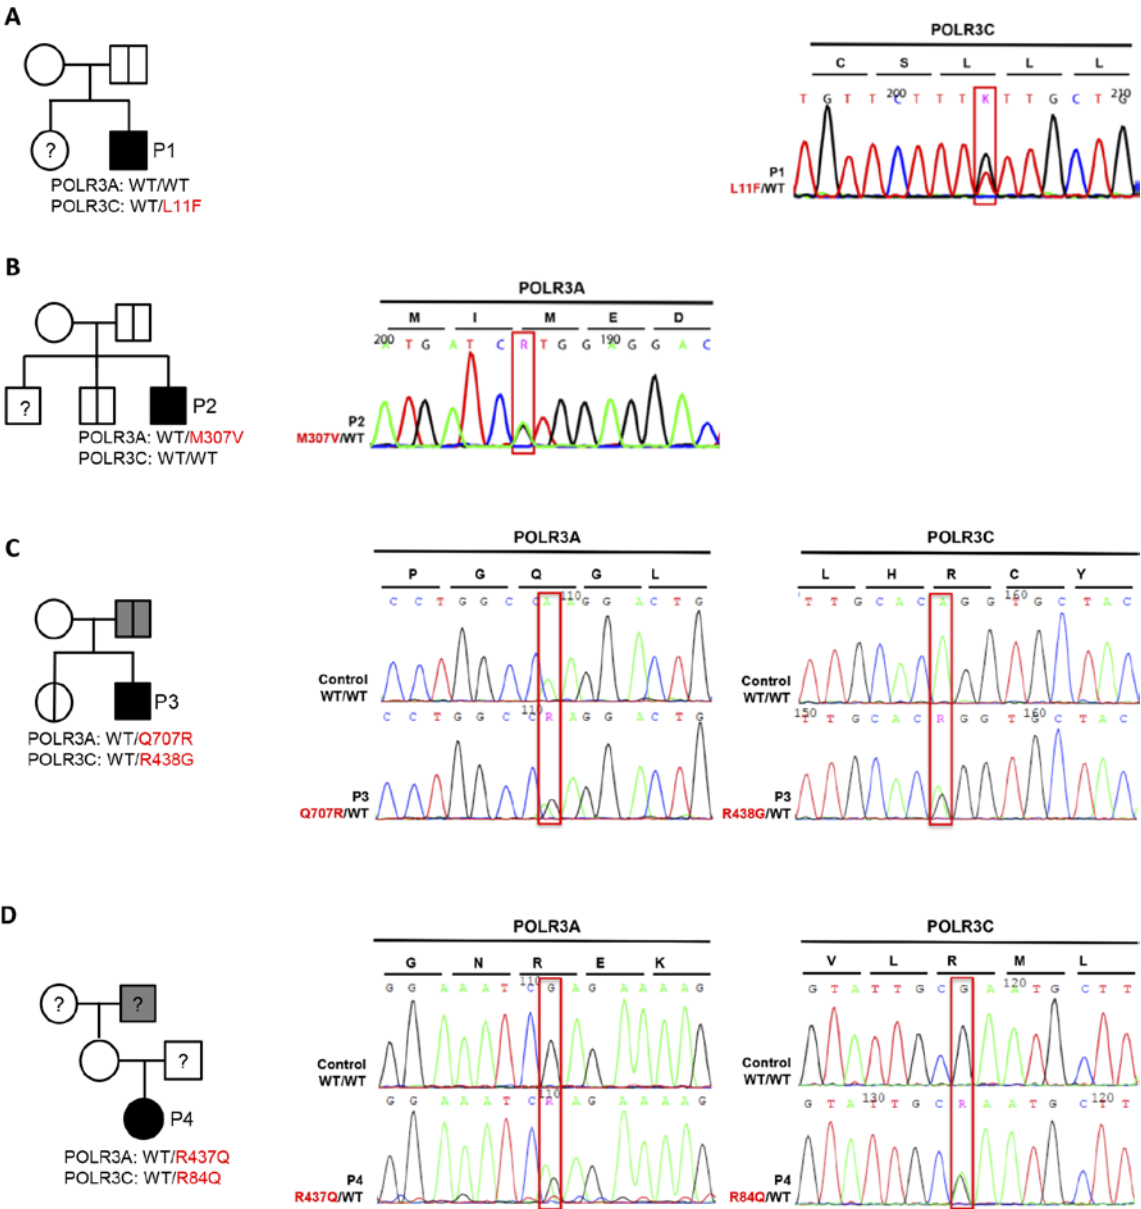

**Supplemental Figure 1. Sanger sequencing of *POLR3A* and *POLR3C*.** DNA sequences of the regions in the *POLR3A* and *C* genes carrying the mutations.

## POLR3A

|                       |                               |     |
|-----------------------|-------------------------------|-----|
| <b>P2</b>             | 293                           | 322 |
| Homo sapiens          | IKKHRISGAKTQMIEDWDFLQQLCALYIN |     |
| Macaca mulatta        | IKKHRISGAKTQMIEDWDFLQQLCALYIN |     |
| Pan troglodytes       | IKKHRISGAKTQMIEDWDFLQQLCALYIN |     |
| Bos taurus            | IKKHRISGAKTQMIEDWDFLQQLCALYIN |     |
| Sus scrofa            | IKKHRISGAKTQMIEDWDFLQQLCALYIN |     |
| Equus caballus        | IKKHRISGAKTQMIEDWDFLQQLCALYIN |     |
| Oryctolagus cuniculus | IKKHRISGAKTQMIEDWDFLQQLCALYIN |     |
| Rattus norvegicus     | IKKHRISGAKTQMIEDWDFLQQLCALYIN |     |
| Mus musculus          | IKKHRISGAKTQMIEDWDFLQQLCALYIN |     |
| Otolemur garnettii    | IKKHRISGAKTQMIEDWDFLQQLCALYIN |     |
| Monodelphis domestica | IKKHRISGAKTQMIEDWDFLQQLCALYIN |     |
| Papio anubis          | IKKHRISGAKTQMIEDWDFLQQLCALYIN |     |
| Callithrix jacchus    | IKKHRISGAKTQMIEDWDFLQQLCALYIN |     |
| Canis familiaris      | IKKHRISGAKTQMIEDWDFLQQLCALYIN |     |
| Loxodonta africana    | IKKHRISGAKTQMIEDWDFLQQLCALYIN |     |
| Ovis aries            | IKKHRISGAKTQMIEDWDFLQQLCALYIN |     |
| Felis catus           | IKKHRISGAKTQMIEDWDFLQQLCALYIN |     |

|                       |                               |     |
|-----------------------|-------------------------------|-----|
| <b>P3</b>             | 693                           | 722 |
| Homo sapiens          | NRGFSIGIGDVTPCGLLKAKYELLNAGKY |     |
| Macaca mulatta        | NRGFSIGIGDVTPCGLLKAKYELLNAGKY |     |
| Pan troglodytes       | NRGFSIGIGDVTPCGLLKAKYELLNAGKY |     |
| Bos taurus            | NRGFSIGIGDVTPCGLLKAKYELLNAGKY |     |
| Sus scrofa            | NRGFSIGIGDVTPCGLLKAKYELLNAGKY |     |
| Equus caballus        | NRGFSIGIGDVTPCGLLKAKYELLNAGKY |     |
| Oryctolagus cuniculus | NRGFSIGIGDVTPCGLLKAKYELLNAGKY |     |
| Rattus norvegicus     | NRGFSIGIGDVTPCGLLKAKYELLNAGKY |     |
| Mus musculus          | NRGFSIGIGDVTPCGLLKAKYELLNAGKY |     |
| Otolemur garnettii    | NRGFSIGIGDVTPCGLLKAKYELLNAGKY |     |
| Monodelphis domestica | NRGFSIGIGDVTPCGLLKAKYELLNAGKY |     |
| Papio anubis          | NRGFSIGIGDVTPCGLLKAKYELLNAGKY |     |
| Callithrix jacchus    | NRGFSIGIGDVTPCGLLKAKYELLNAGKY |     |
| Canis familiaris      | NRGFSIGIGDVTPCGLLKAKYELLNAGKY |     |
| Loxodonta africana    | NRGFSIGIGDVTPCGLLKAKYELLNAGKY |     |
| Ovis aries            | NRGFSIGIGDVTPCGLLKAKYELLNAGKY |     |
| Felis catus           | NRGFSIGIGDVTPCGLLKAKYELLNAGKY |     |

|                       |                                  |     |
|-----------------------|----------------------------------|-----|
| <b>P4</b>             | 423                              | 452 |
| Homo sapiens          | QRHTQMK--RFLKYGNREKMAQELKYGDIVER |     |
| Macaca mulatta        | QRHTQMK--RFLKYGNREKMAQELKYGDIVER |     |
| Pan troglodytes       | QRHTQMK--RFLKYGNREKMAQELKYGDIVER |     |
| Bos taurus            | QRHTQMK--RFLKYGNREKMAQELKPGDIVER |     |
| Sus scrofa            | QRHTQMK--RFLKYGNREKMAQELKPGDIVER |     |
| Equus caballus        | QRHTQMK--RFLKYGNREKMAQELKPGDIVER |     |
| Oryctolagus cuniculus | QRHMHMK--RFLKYGNREKMAQELKYGDIVER |     |
| Rattus norvegicus     | QRHMQMK--RFLKYGNREKMAQELKPGDIVER |     |
| Mus musculus          | QRHMQMK--RFLKYGNREKMAQELKPGDIVER |     |
| Otolemur garnettii    | QRHTQMK--RFLKYGNREKMAQELKYGDIVER |     |
| Monodelphis domestica | QRHMQMK--RFLKYGNREKMAQELKPGDIVER |     |
| Papio anubis          | QRHTQMK--RFLKYGNREKMAQELKYGDIVER |     |
| Callithrix jacchus    | QRHTQMK--RFLKYGNREKMAQELKYGDIVER |     |
| Canis familiaris      | QRHTQMK--RFLKYGNREKMAQELKYGDIVER |     |
| Loxodonta africana    | QRHTQMK--RFLKYGNREKMAQELKYGDIVER |     |
| Ovis aries            | QRHTQMKRLRFLKYGNREKMAQELKPGDIVER |     |
| Felis catus           | QRHTQMK--RFLKYGNREKMAQELKYGDIVER |     |

## POLR3C

|                       |                               |    |
|-----------------------|-------------------------------|----|
| <b>P1</b>             | 1                             | 30 |
| Homo sapiens          | MTQAEIKLCSLLQEHFGEIVEKIGVHLIR |    |
| Macaca mulatta        | MTQAEIKLCSLLQEHFGEIVEKIGVHLIR |    |
| Pan troglodytes       | MTQAEIKLCSLLQEHFGEIVEKIGVHLIR |    |
| Bos taurus            | MTQAEIKLCSLLQEHFGEIVEKIGVHLIR |    |
| Sus scrofa            | MTQAEIKLCSLLQEHFGEIVEKIGVHLIR |    |
| Equus caballus        | MTQAEIKLCSLLQEHFGEIVEKIGVHLIR |    |
| Oryctolagus cuniculus | MTQAEIKLCSLLQEHFGEIVEKIGVHLIR |    |
| Rattus norvegicus     | MTQAEIKLCSLLQEHFGEIVEKIGVHLIR |    |
| Mus musculus          | MTQAEIKLCSLLQEHFGEIVEKIGVHLIR |    |
| Otolemur garnettii    | MTQAEIKLCSLLQEHFGEIVEKIGVHLIR |    |
| Monodelphis domestica | MTQAEIKLCSLLQEHFGEIVEKIGVHLIR |    |
| Papio anubis          | MTQAEIKLCSLLQEHFGEIVEKIGVHLIR |    |
| Callithrix jacchus    | MTQAEIKLCSLLQEHFGEIVEKIGVHLIR |    |
| Canis familiaris      | MTQAEIKLCSLLQEHFGEIVEKIGVHLIR |    |
| Loxodonta africana    | MTQAEIKLCSLLQEHFGEIVEKIGVHLIR |    |
| Ovis aries            | MTQAEIKLCSLLQEHFGEIVEKIGVHLIR |    |
| Felis catus           | MTQAEIKLCSLLQEHFGEIVEKIGVHLIR |    |

|                       |                                 |    |
|-----------------------|---------------------------------|----|
| <b>P3</b>             | 70                              | 99 |
| Homo sapiens          | RGVVEYEAQCSRVLMRLRYPRYIYTTKTLTY |    |
| Macaca mulatta        | RGVVEYEAQCSRVLMRLRYPRYIYTTKTLTY |    |
| Pan troglodytes       | RGVVEYEAQCSRVLMRLRYPRYIYTTKTLTY |    |
| Bos taurus            | RGVVEYEAQCSRVLMRLRYPRYIYTTKTLTY |    |
| Sus scrofa            | RGVVEYEAQCSRVLMRLRYPRYIYTTKTLTY |    |
| Equus caballus        | RGVVEYEAQCSRVLMRLRYPRYIYTTKTLTY |    |
| Oryctolagus cuniculus | RGVVEYEAQCSRVLMRLRYPRYIYTTKTLTY |    |
| Rattus norvegicus     | RGVVEYEAQCSRVLMRLRYPRYIYTTKTLTY |    |
| Mus musculus          | RGVVEYEAQCSRVLMRLRYPRYIYTTKTLTY |    |
| Otolemur garnettii    | RGVVEYEAQCSRVLMRLRYPRYIYTTKTLTY |    |
| Monodelphis domestica | RGVVEYEAQCSRVLMRLRYPRYIYTTKTLTY |    |
| Papio anubis          | RGVVEYEAQCSRVLMRLRYPRYIYTTKTLTY |    |
| Callithrix jacchus    | RGVVEYEAQCSRVLMRLRYPRYIYTTKTLTY |    |
| Canis familiaris      | RGVVEYEAQCSRVLMRLRYPRYIYTTKTLTY |    |
| Loxodonta africana    | RGVVEYEAQCSRVLMRLRYPRYIYTTKTLTY |    |
| Ovis aries            | RGVVEYEAQCSRVLMRLRYPRYIYTTKTLTY |    |
| Felis catus           | RGVVEYEAQCSRVLMRLRYPRYIYTTKTLTY |    |

|                       |                              |     |
|-----------------------|------------------------------|-----|
| <b>P4</b>             | 424                          | 453 |
| Homo sapiens          | YTVNLSAARMLLHCYKSIANLIERRQFE |     |
| Macaca mulatta        | YTVNLSAARMLLHCYKSIANLIERRQFE |     |
| Pan troglodytes       | YTVNLSAARMLLHCYKSIANLIERRQFE |     |
| Bos taurus            | YTVNLSAARMLLHCYKSIANLIERRQFE |     |
| Sus scrofa            | YTVNLSAARMLLHCYKSIANLIERRQFE |     |
| Equus caballus        | YTVNLSAARMLLHCYKSIANLIERRQFE |     |
| Oryctolagus cuniculus | YTVNLSAARMLLHCYKSIANLIERRQFE |     |
| Rattus norvegicus     | YTVNLSAARMLLHCYKSIANLIERRQFE |     |
| Mus musculus          | YTVNLSAARMLLHCYKSIANLIERRQFE |     |
| Otolemur garnettii    | YTVNLSAARMLLHCYKSIANLIERRQFE |     |
| Monodelphis domestica | YTVNLSAARMLLHCYKSIANLIERRQFE |     |
| Papio anubis          | YTVNLSAARMLLHCYKSIANLIERRQFE |     |
| Callithrix jacchus    | YTVNLSAARMLLHCYKSIANLIERRQFE |     |
| Canis familiaris      | YTVNLSAARMLLHCYKSIANLIERRQFE |     |
| Loxodonta africana    | YTVNLSAARMLLHCYKSIANLIERRQFE |     |
| Ovis aries            | YTVNLSAARMLLHCYKSIANLIERRQFE |     |
| Felis catus           | YTVNLSAARMLLHCYKSIANLIERRQFE |     |

**Supplemental Figure 2. Alignments.** Alignment across species of the regions surrounding the mutations. Residues marked in red, represent the residue in patients. Residues marked in green represent the residue in the human wildtype allele. Residues marked in yellow are not conserved, but have similar physical properties as the conserved residue at the given position.

**A**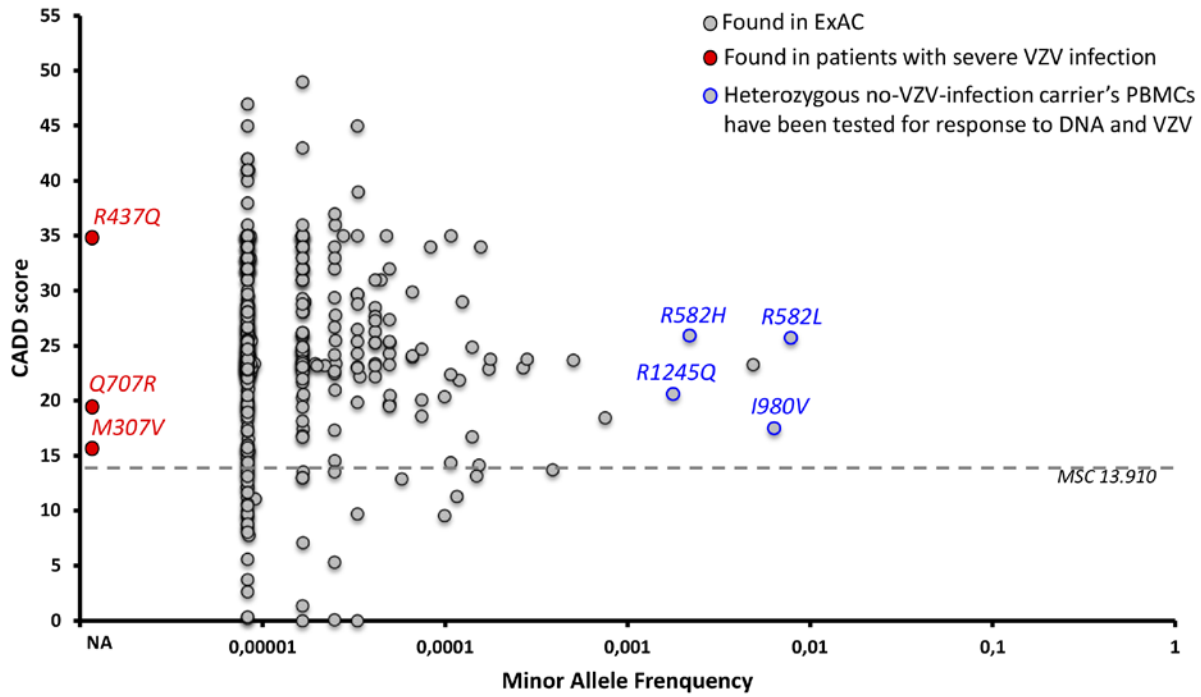**B**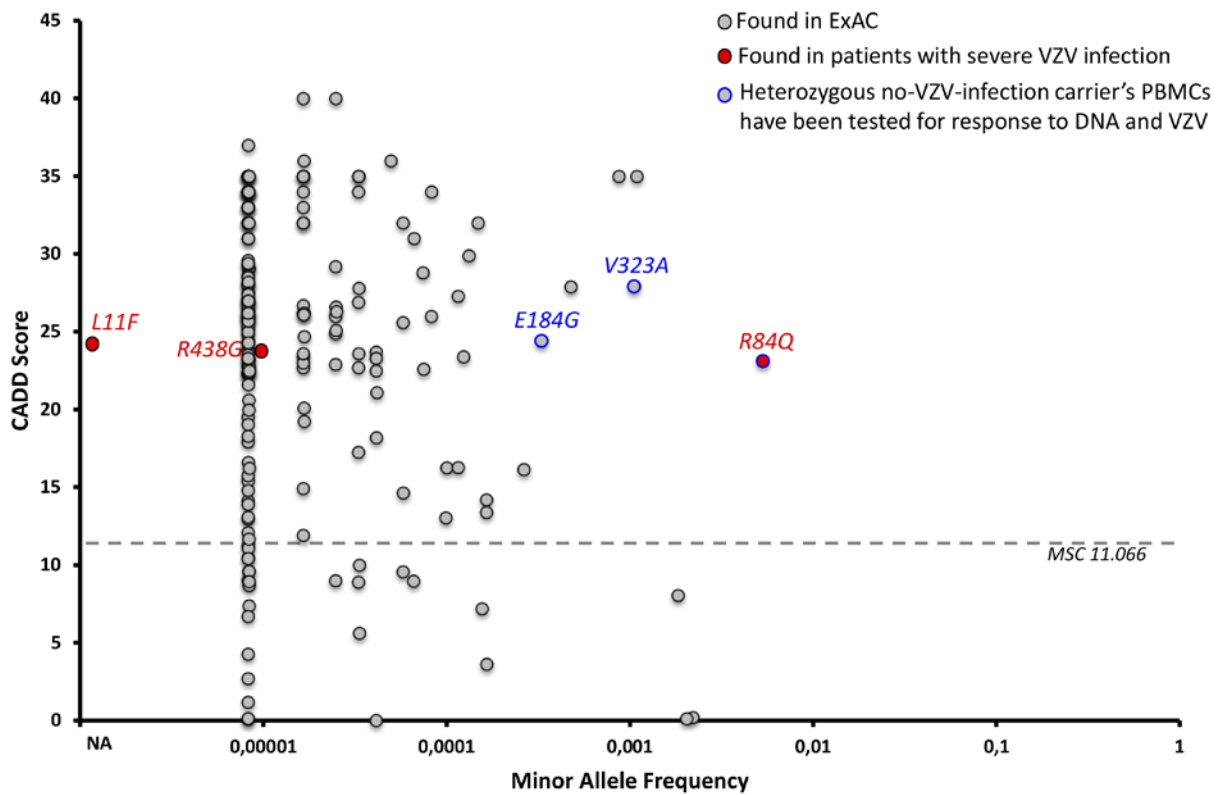

**Supplemental Figure 3. Analysis of CADD score versus allele frequency variations in ExAC and VZV patients. (A) *POLR3A*, (B) *POLR3C*. MSC, Mutation Significance Cutoffs.**

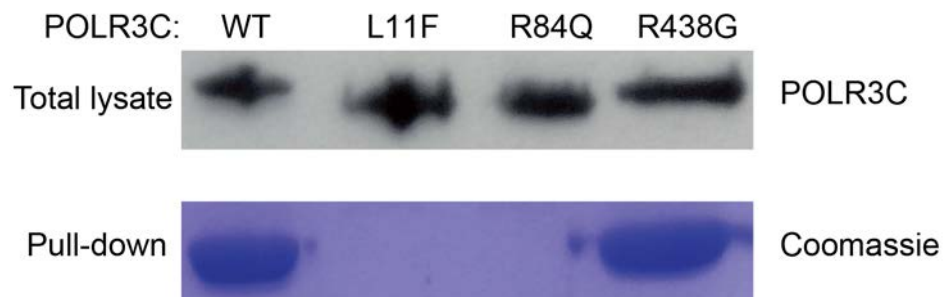

**Supplemental Figure 4. Expression of WT and patient POLR3C in bacteria.** Bacteria were transduced with plasmids encoding WT POLR3C and the 3 mutant forms from P1, P3, and P4 with a His-tag at the N-terminus. POLR3C expression was induced by addition of 1 mM IPTG treatment. Total lysates were analyzed for expression of POLR3C by Western blot, thus demonstrating that all mutants were expressed (top panel). Lysates were collected and evaluated for protein retention by the His-tag Nickel affinity resin.

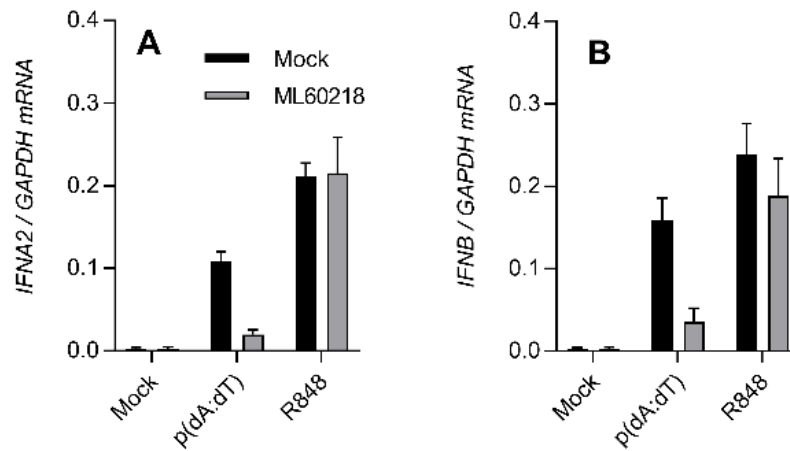

**Supplemental Figure 5. POL III-dependent stimulation of IFN expression by poly(dA:dT) in PBMCs.** PBMCs from a healthy donor were treated with the Pol III inhibitor ML-60218 (10  $\mu$ M) for 16 h prior to transfection of poly(dA:dT) (2  $\mu$ g/mL) or treatment with R848 (1  $\mu$ g/mL). Total RNA was harvested 6 h after stimulation and levels of (A) *IFNA2* and (B) *IFNB* mRNA were determined by RT-qPCR as shown. Data are shown as means  $\pm$  st.dev.

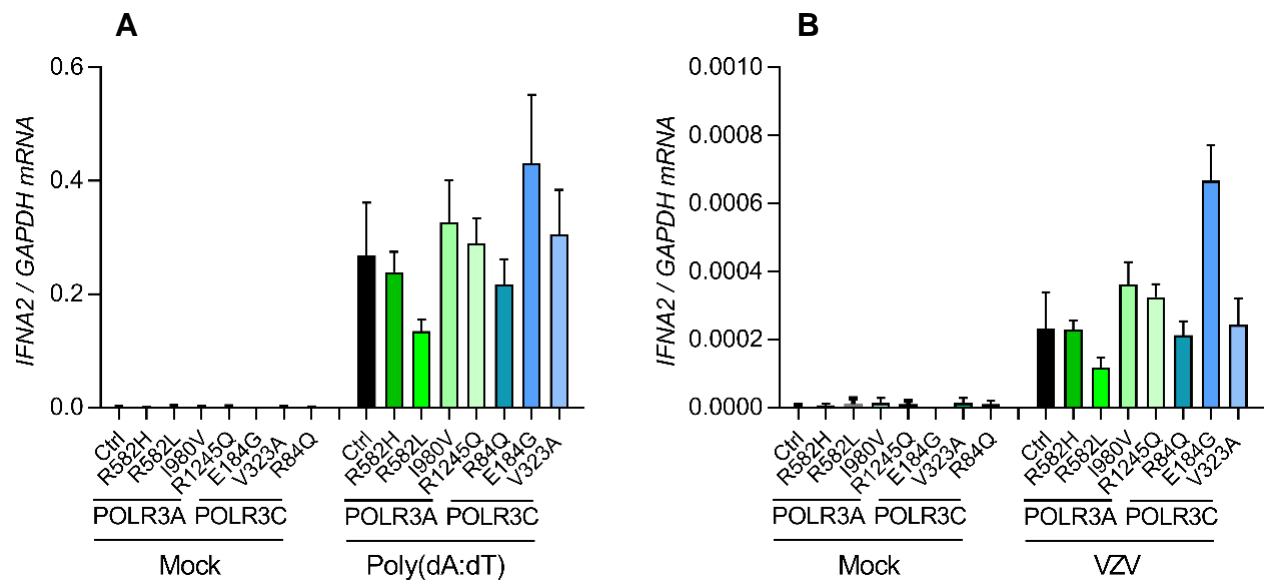

**Supplemental Figure 6. Expression of *IFNA2* by PBMCs from donors with other POLR3 mutations.** PBMCs from donors with other POLR3 mutations than the ones found in the patients were (A) transfected with poly(dA:dT) (2  $\mu$ g/mL), or (B) VZV-infected MeWo cells. Total RNA was harvested 6h after poly(dA:dT) stimulation and 48 h after initiation of co-culture with VZV-MeWo cells. Levels of *IFNA2* mRNA were determined by RT-qPCR as indicated. The levels of cytokine mRNAs were normalized to *GAPDH*, and data are presented as means  $\pm$  st.dev. Ctrl, Control. Average of 4 sex- and age-matched controls.

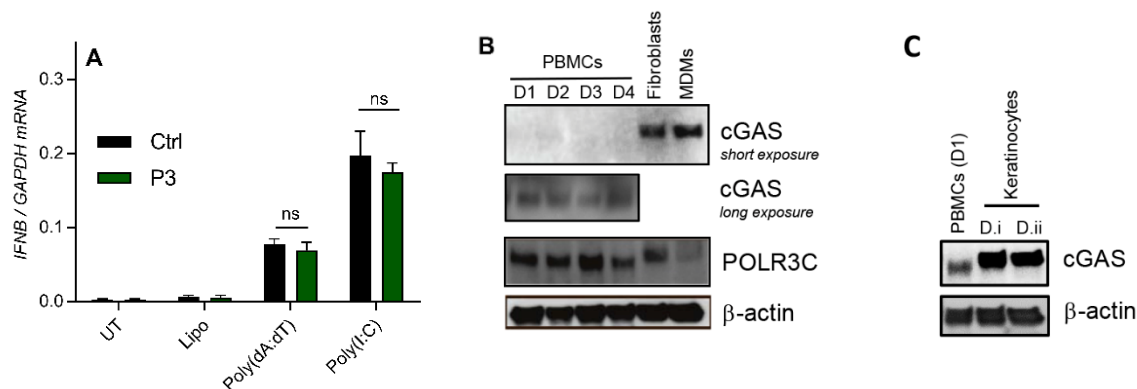

**Supplemental Figure 7. Normal response to DNA in fibroblasts from P3.** Fibroblasts from P3 and a healthy donor were transfected with (A) poly(dA:dT) or poly(I:C) (both 2  $\mu$ g/mL). Total RNA was harvested 6 h later and levels of *IFNB* mRNA were determined by RT-qPCR, normalized to *GAPDH*, and presented as means  $\pm$  st.dev. ns,  $p > 0.05$ . (B) Total cell lysates from PBMCs (4 donors), skin fibroblasts, and monocyte-derived macrophages were immunoblotted for the levels of cGAS, POLR3C, and  $\beta$ -actin. (C) Total cell lysates from PBMCs (1 donor), and keratinocytes (2 donors) were immunoblotted for the levels of cGAS and  $\beta$ -actin.

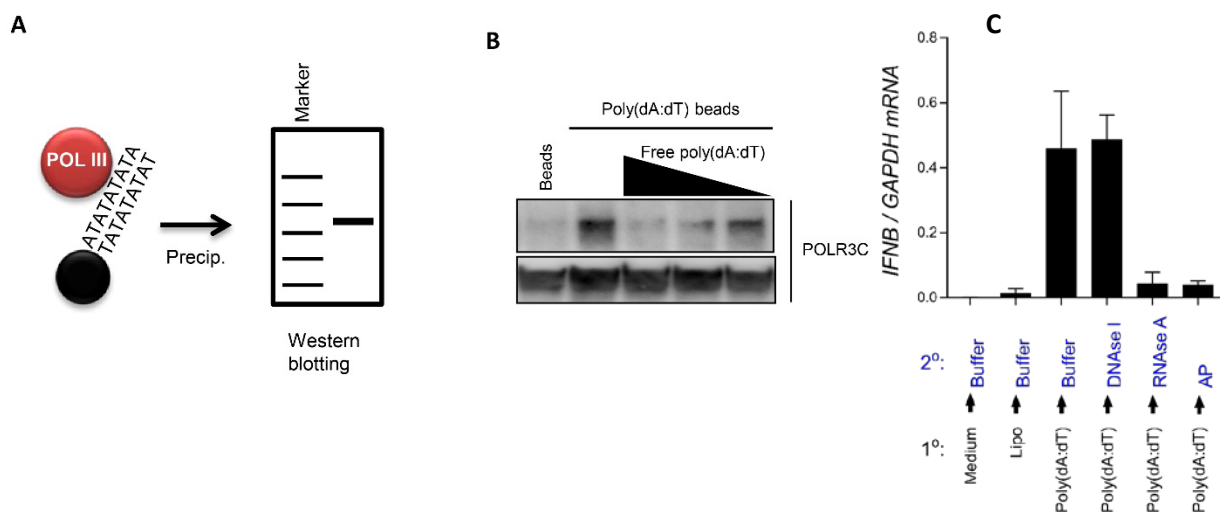

**Supplemental Figure 8. Poly(dA:dT) interacts with POL III and leads to generation of immunostimulatory 5'-triphosphorylated RNA.** (A) Illustration of the principle steps in precipitation and identification of poly(dA:dT)-interacting proteins. (B) Poly(dA:dT) beads incubated with cytoplasmic extracts of PBMCs from a healthy donor in the presence and absence of increasing levels of free poly(dA:dT) were precipitated and immunoblotted with anti-POLR3C. (C) PBMCs from one healthy donor were treated as indicated under 1°. Total RNA was isolated 14 h later, and the RNA was treated as specified under 2° before transfection into HEK293 cells. Total RNA was harvested 6 h later and levels of *IFNB* mRNA were determined by RT-qPCR and normalized to *GAPDH*. Data are presented as means  $\pm$  st.dev.

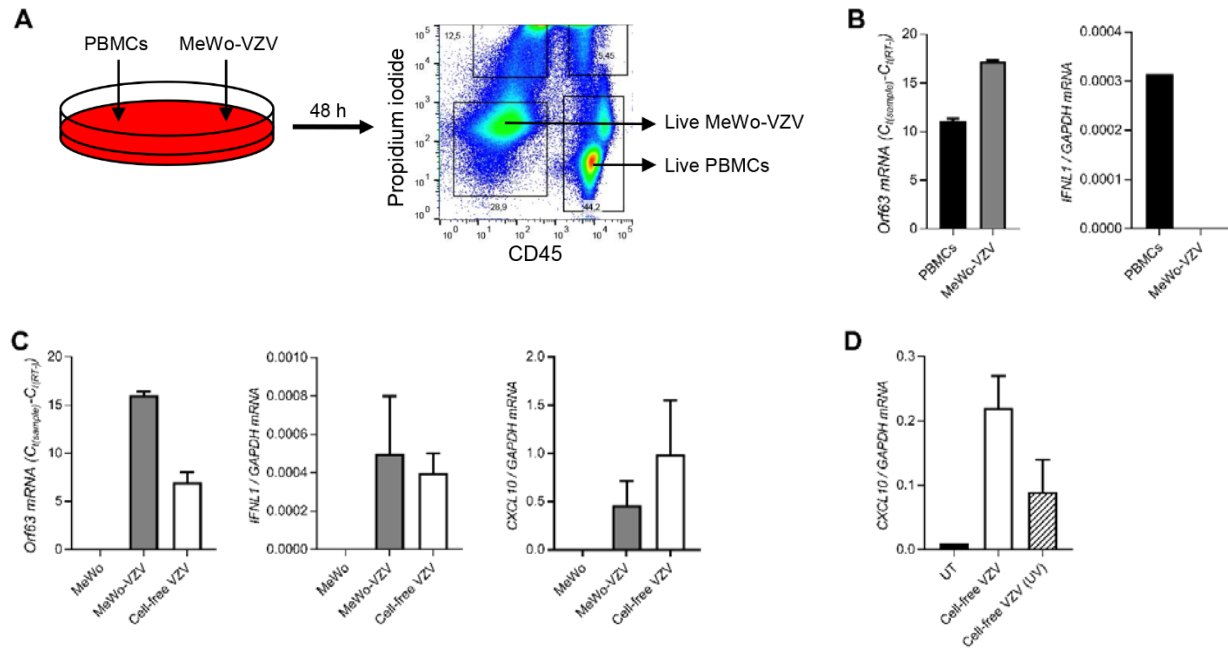

**Supplemental Figure 9. Characterization of the PBMC-MeWo coculture system.** (A, B) PBMCs from a healthy donor were co-cultured with MeWo cells (VZV-infected or non-infected) in a 1:1 ratio. The cells two cell populations were separated 48 h later by sorting for CD45 expression, and levels of *Orf63* and *IFNL1* mRNA were determined by RT-qPCR. (C) PBMCs were co-cultured with (i) uninfected MeWo cells, (ii) VZV-infected MeWo cells in a 1:1 ratio, or (iii) sonicated and cleared lysates from infected MeWo cells (cell-free VZV). (D) In a different experimental set-up PBMCs were co-cultured with cell-free VZV +/- UV-treatment prior to addition to the PBMCs. Total RNA was harvested 12 h after initiation of co-culture/infection, and levels of *Orf63*, *IFNL1*, and *CXCL10* mRNA was determined by RT-qPCR. Data are presented as means +/- st.dev.

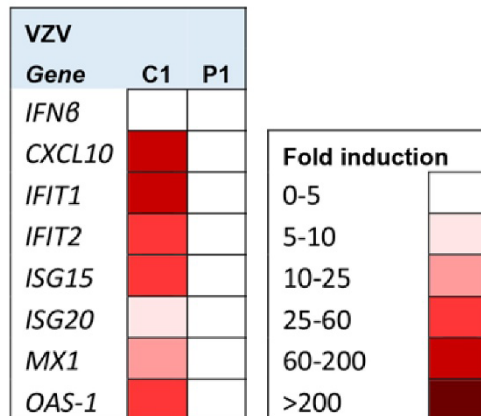

**Supplemental Figure 10. Reduced ISG expression in P1 PBMCs after VZV infection.** PBMCs from P1 and an age- and gender-matched healthy control were treated with VZV-infected MeWo cells for 48 h. Total RNA was harvested and levels of IFN $\beta$  and selected ISGs were determined by Fluidigm. The data were normalized to  $\beta$ -actin levels (which were comparable between the two groups) and are shown as heat-maps, with each color point representing means of 3 biological replicates.

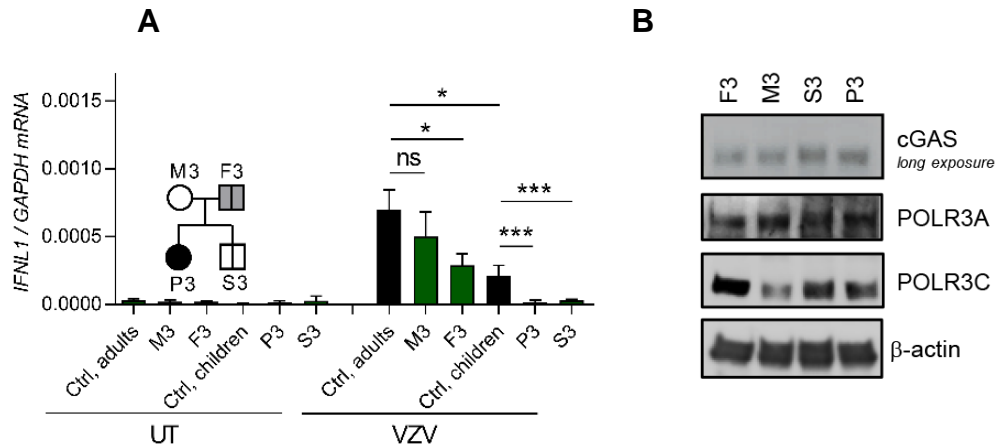

**Supplemental Figure 11. Characterization of *IFNλ1* production in response to VZV infection by PBMCs from the family of P3.** (A) PBMCs from P3, family members, and age-matched healthy controls were treated with VZV-infected MeWo cells. Total RNA was harvested 48 h after initiation of co-culture with VZV-MeWo cells and levels of *IFNλ1* mRNA were determined by RT-qPCR. The levels of the mRNA of interest was normalized to *GAPDH*, and data are presented as means  $\pm$  st.dev. Ctrl, Control. Average of 7 and 12 age-matched adult controls in the adult and children groups, respectively. ns,  $p > 0.05$ ; \*,  $0.01 < p < 0.05$ ; \*\*,  $0.01 < p < 0.001$ ; \*\*\*,  $0.001 < p < 0.0001$ . (B) Expression levels of cGAS, POLR3A, POLR3C, and β-actin in PBMCs lysates from the family of P3.

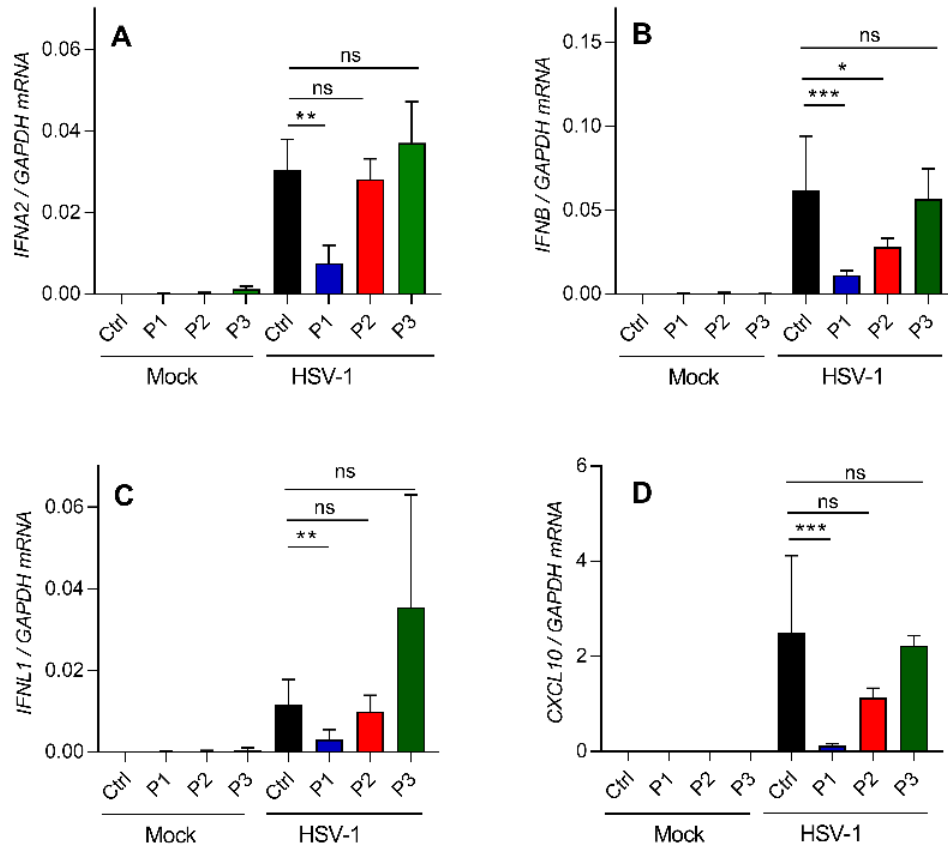

**Supplemental Figure 12. Expression of IFNs and ISGs by PBMCs from P1-P3 after HSV-1 infection.** PBMCs from P1, P2, P3 and healthy controls were infected with HSV-1 (MOI 3). Total RNA was harvested 6 h after infection and levels of (A) *IFNA2*, (B) *IFNB*, (C) *IFNL1*, and (D) *CXCL10* mRNA were determined by RT-qPCR as indicated. The levels of cytokine mRNAs were normalized to *GAPDH*, and data are presented as means  $\pm$  st.dev. Ctrl, Control. Average of 4 sex- and age-matched controls. ns,  $p > 0.05$ ; \*,  $0.01 < p < 0.05$ ; \*\*,  $0.01 < p < 0.001$ ; \*\*\*,  $0.001 < p < 0.0001$ .

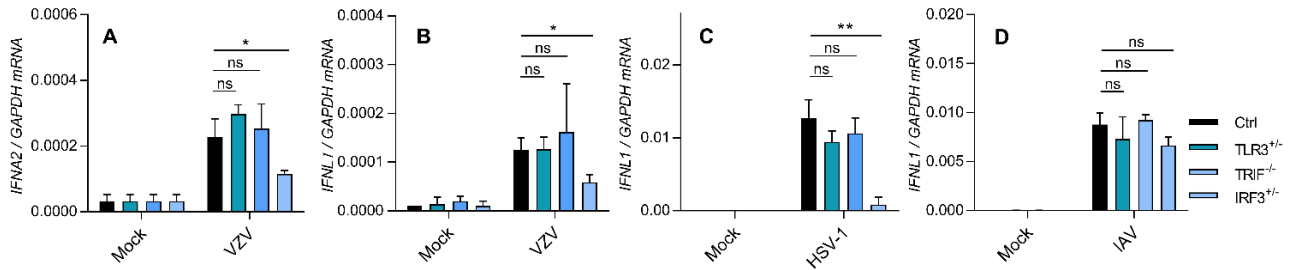

**Supplemental Figure 13. PBMCs from patients with mutations in TLR3 pathway genes have normal response to VZV infection.** PBMCs from healthy controls and patients with the indicated mutations in genes of the TLR3 pathway were (A, B) treated with VZV-infected MeWo cells, (C) infected with HSV-1 (MOI 3), or (D) IAV (MOI 8). Total RNA was harvested 48 h after initiation of co-culture with VZV-MeWo cells and 6 h after HSV and IAV infections. Levels of *IFNA2* and *IFNL1* mRNA were determined by RT-qPCR as indicated. The levels of the mRNA of interest were normalized to *GAPDH*, and data are presented as means  $\pm$  st.dev. Ctrl, Control. Average of 4 age-matched controls. ns,  $p > 0.05$ ; \*,  $0.01 < p < 0.05$ ; \*\*,  $0.01 < p < 0.001$ ; \*\*\*,  $0.001 < p < 0.0001$ .

**Supplemental Table 1. Genes involved in IFN production and function**

| <b>Gene symbol</b> | <b>Gene name</b>                                                                                | <b>HGNC ID</b> | <b>Chromosome Location</b> |
|--------------------|-------------------------------------------------------------------------------------------------|----------------|----------------------------|
| <i>ADAR1</i>       | Adenosine deaminase                                                                             | 103            | 1q21.3                     |
| <i>AIM2</i>        | Absent in melanoma 2                                                                            | 357            | 1q22                       |
| <i>AMFR</i>        | Autocrine Motility Factor Receptor                                                              | 463            | 16q21                      |
| <i>APOBEC3G</i>    | apolipoprotein B mRNA editing enzyme catalytic subunit 3G                                       | 17357          | 22q13.1-q13.2              |
| <i>ATF2</i>        | Activating transcription factor 2                                                               | 784            | 2q32                       |
| <i>ATM</i>         | Ataxia telangiectasia mutated                                                                   | 795            | 11q22-q23                  |
| <i>BST2</i>        | Bone marrow stromal cell antigen 2                                                              | 1119           | 19p13.1                    |
| <i>BTK</i>         | Bruton agammaglobulinemia tyrosine kinase                                                       | 1133           | Xq21.33-q22                |
| <i>CASP1</i>       | Caspase 1                                                                                       | 1499           | 11q23                      |
| <i>CASP10</i>      | Caspase 10                                                                                      | 1500           | 2q33-q34                   |
| <i>CASP8</i>       | Caspase 8                                                                                       | 1509           | 2q33-q34                   |
| <i>CD74</i>        | CD74                                                                                            | 1697           | 5q32                       |
| <i>CHUK</i>        | Conserved helix-loop-helix ubiquitous kinase / Nuclear Factor NF-Kappa-B Inhibitor Kinase Alpha | 1974           | 10q24-q25                  |
| <i>CIITA</i>       | Class II, major histocompatibility complex, transactivator                                      | 7067           | 16p13                      |
| <i>CXCL9</i>       | C-X-C motif chemokine ligand 9                                                                  | 4283           | 4q21                       |
| <i>CXCL10</i>      | C-X-C motif chemokine ligand 10                                                                 | 3627           | 4q21                       |
| <i>CXCL11</i>      | C-X-C motif chemokine ligand 11                                                                 | 6373           | 4q21.2                     |
| <i>DDX41</i>       | DEAD (Asp-Glu-Ala-Asp) box polypeptide 41                                                       | 18674          | 5q35.3                     |
| <i>DDX58</i>       | DEAD (Asp-Glu-Ala-Asp) box polypeptide 58 (RIG-I)                                               | 23586          | 9p12                       |
| <i>DDX60</i>       | DEAD (Asp-Glu-Ala-Asp) box polypeptide 58                                                       | 25942          | 4q32.3                     |
| <i>DHX9</i>        | DEAH-box helicase 9                                                                             | 2750           | 1q25                       |
| <i>DHX36</i>       | DEAH-box helicase 36                                                                            | 14410          | 3q25.2                     |
| <i>DHX58</i>       | DEAH-box helicase 58 (LGP2)                                                                     | 29517          | 17q21.2                    |
| <i>DOCK2</i>       | Dedicator of cytokinesis 2                                                                      | 1794           | 5q35.1                     |
| <i>DOCK8</i>       | Dedicator of cytokinesis 8                                                                      | 19191          | 9p24.3                     |
| <i>GBP1</i>        | Guanylate binding protein 1                                                                     | 4182           | 1p22.2                     |
| <i>GBP2</i>        | Guanylate binding protein 2                                                                     | 4183           | 1p22.2                     |
| <i>GATA2</i>       | GATA binding protein 2                                                                          | 4171           | 3q21                       |
| <i>HPSE</i>        | Heparanase                                                                                      | 5164           | 4q21.3                     |
| <i>IFI6</i>        | Interferon alpha inducible protein 6                                                            | 4054           | 1p35                       |
| <i>IFI16</i>       | Interferon, gamma-inducible protein 16                                                          | 5395           | 1q22                       |
| <i>IFIH1</i>       | Interferon induced with helicase C domain 1 (MDA5)                                              | 18873          | 2q24.2                     |
| <i>IFIT1</i>       | Interferon induced protein with tetratricopeptide repeats 1                                     | 5407           | 10q23.31                   |
| <i>IFIT2</i>       | Interferon induced protein with tetratricopeptide repeats 2                                     | 5409           | 10q23.31                   |
| <i>IFIT3</i>       | Interferon induced protein with tetratricopeptide repeats 3                                     | 5411           | 10q24                      |

|               |                                                                               |       |               |
|---------------|-------------------------------------------------------------------------------|-------|---------------|
| <i>IFITM1</i> | Interferon induced transmembrane protein 1                                    | 5412  | 11p15.5       |
| <i>IFITM2</i> | Interferon induced transmembrane protein 2                                    | 5413  | 11p15.5       |
| <i>IFITM3</i> | Interferon induced transmembrane protein 3                                    | 5414  | 11p15.5       |
| <i>IFNA1</i>  | Interferon alpha1                                                             | 3439  | 9p22          |
| <i>IFNA2</i>  | Interferon alpha2                                                             | 3440  | 9p22          |
| <i>IFNA4</i>  | Interferon alpha4                                                             | 3441  | 9p22          |
| <i>IFNA5</i>  | Interferon alpha5                                                             | 3442  | 9p22          |
| <i>IFNA6</i>  | Interferon alpha6                                                             | 3443  | 9p22          |
| <i>IFNA7</i>  | Interferon alpha7                                                             | 3444  | 9p22          |
| <i>IFNA8</i>  | Interferon alpha8                                                             | 3445  | 9p22          |
| <i>IFNA10</i> | Interferon alpha10                                                            | 3446  | 9p22          |
| <i>IFNA13</i> | Interferon alpha13                                                            | 3447  | 9p22          |
| <i>IFNA14</i> | Interferon alpha14                                                            | 3448  | 9p22          |
| <i>IFNA16</i> | Interferon alpha16                                                            | 3449  | 9p22          |
| <i>IFNA17</i> | Interferon alpha17                                                            | 3451  | 9p22          |
| <i>IFNA21</i> | Interferon alpha21                                                            | 3452  | 9p22          |
| <i>IFNAR1</i> | Interferon alpha and beta receptor subunit 1                                  | 3454  | 21q22.11      |
| <i>IFNAR2</i> | Interferon alpha and beta receptor subunit 1                                  | 3455  | 21q22.11      |
| <i>IFNB1</i>  | Interferon, beta1                                                             | 3456  | 9p21          |
| <i>IFNG</i>   | Interferon gamma                                                              | 5438  | 12q14         |
| <i>IFNGR1</i> | Interferon gamma receptor 1                                                   | 5439  | 6q23-q24      |
| <i>IFNGR2</i> | Interferon gamma receptor 2 (interferon gamma transducer 1)                   | 5440  | 21q22.1       |
| <i>IFNL1</i>  | Interferon lambda 1                                                           | 18363 | 19q13.13      |
| <i>IFNL2</i>  | Interferon lambda 2                                                           | 18364 | 19q13.13      |
| <i>IFNL3</i>  | Interferon lambda 3                                                           | 18365 | 19q13.13      |
| <i>IFNL4</i>  | Interferon lambda 4                                                           | 44480 | 19q13.12      |
| <i>IFNLR1</i> | Interferon lambda receptor 1                                                  | 18584 | 1p36.11       |
| <i>IKBKB</i>  | Inhibitor of kappa light polypeptide gene enhancer in B-cells, kinase beta    | 5960  | 8p11.2        |
| <i>IKBKE</i>  | Inhibitor of kappa light polypeptide gene enhancer in B-cells, kinase epsilon | 14552 | 1q31          |
| <i>IKBKG</i>  | Inhibitor of kappa light polypeptide gene enhancer in B-cells, kinase gamma   | 5961  | Xq28          |
| <i>IL10RB</i> | interleukin 10 receptor subunit beta                                          | 5965  | 21q22.11      |
| <i>IL1RN</i>  | Interleukin 1 receptor antagonist                                             | 6000  | 2q14.2        |
| <i>IRAK1</i>  | Interleukin-1 receptor-associated kinase 1                                    | 3654  | Xq28          |
| <i>IRAK2</i>  | Interleukin-1 receptor-associated kinase 2                                    | 3656  | 3p25.3        |
| <i>IRAK4</i>  | Interleukin-1 receptor-associated kinase 4                                    | 17967 | 12q12         |
| <i>IRF1</i>   | Interferon regulatory factor 1                                                | 6116  | 5q31.1        |
| <i>IRF3</i>   | Interferon regulatory factor 3                                                | 6118  | 19q13.3-q13.4 |
| <i>IRF5</i>   | Interferon regulatory factor 5                                                | 6210  | 7q32          |
| <i>IRF7</i>   | Interferon regulatory factor 7                                                | 6122  | 11p15.5       |
| <i>IRF8</i>   | Interferon regulatory factor 8                                                | 5358  | 16q24.1       |

|                |                                                                                     |          |              |
|----------------|-------------------------------------------------------------------------------------|----------|--------------|
| <i>IRF9</i>    | Interferon regulatory factor 9                                                      | 6131     | 14q11.2      |
| <i>ISG15</i>   | Interferon stimulated gene 15, ubiquitin-like modifier                              | 4053     | 1p36.33      |
| <i>ISG20</i>   | Interferon stimulated gene 20, exonuclease                                          | 6130     | 15q26        |
| <i>JAK1</i>    | Janus kinase 1                                                                      | 6190     | 1p32.3-p31.3 |
| <i>JAK2</i>    | Janus kinase 2                                                                      | 3717     | 9p24         |
| <i>JAK3</i>    | Janus kinase 3                                                                      | 6193     | 19p13-p12    |
| <i>MB21D1</i>  | Mab-21 domain containing 1 (cGAS)                                                   | 21367    | 6q13         |
| <i>MAP3K14</i> | Mitogen-activated protein kinase kinase 14                                          | 6853     | 17q21        |
| <i>MAVS</i>    | Mitochondrial antiviral signaling protein                                           | 29233    | 20p13        |
| <i>MRE11A</i>  | MRE11 meiotic recombination 11 homolog A ( <i>S. cerevisiae</i> )                   | 7230     | 11q21        |
| <i>MYD88</i>   | Myeloid differentiation primary response 88                                         | 7562     | 3p22         |
| <i>MX1</i>     | MX dynamin like GTPase 1                                                            | 7532     | 21q22.3      |
| <i>MX2</i>     | MX dynamin like GTPase 2                                                            | 7533     | 21q22.3      |
| <i>NAMPT</i>   | Nicotinamide phosphoribosyltransferase                                              | 30092    | 7q22.3       |
| <i>NFKB2</i>   | Nuclear factor of kappa light polypeptide gene enhancer in B-cells 2 (p49/p100)     | 7795     | 10q24        |
| <i>NFKBIA</i>  | Nuclear factor of kappa light polypeptide gene enhancer in B-cells inhibitor, alpha | 7797     | 14q13        |
| <i>NHEJ1</i>   | Nonhomologous end-joining factor 1                                                  | 25737    | 2q35         |
| <i>NLRP12</i>  | NLR family, pyrin domain containing 12                                              | 22938    | 19q13.42     |
| <i>NLRP2</i>   | NLR family, pyrin domain containing 2                                               | 22948    | 19q13.42     |
| <i>NLRP3</i>   | NLR family, pyrin domain containing 3                                               | 16400    | 1q44         |
| <i>NOD2</i>    | Nucleotide-binding oligomerization domain containing 2                              | 5331     | 16q12        |
| <i>OAS1</i>    | 2'-5'-oligoadenylate synthetase 1                                                   | 8086     | 12q24.2      |
| <i>OAS2</i>    | 2'-5'-oligoadenylate synthetase 2                                                   | 8087     | 12q24.2      |
| <i>OAS3</i>    | 2'-5'-oligoadenylate synthetase 3                                                   | 8088     | 12q24.2      |
| <i>OASL</i>    | 2'-5'-oligoadenylate synthetase like                                                | 8090     | 12q24.2      |
| <i>PGM3</i>    | Phosphoglucomutase 3                                                                | 8907     | 6q14.1-q15   |
| <i>PACT</i>    | Protein activator of PKR                                                            | 9438     | 2q31.2       |
| <i>PKR</i>     | Protein kinase activated by double-stranded RNA                                     | 2p22-p21 | 2p22-p21     |
| <i>POLR3A</i>  | RNA polymerase III subunit A                                                        | 30074    | 10q22.3      |
| <i>POLR3B</i>  | RNA polymerase III subunit B                                                        | 30348    | 12q23.3      |
| <i>POLR3C</i>  | RNA polymerase III subunit C                                                        | 30076    | 1q21         |
| <i>POLR3D</i>  | RNA polymerase III subunit D                                                        | 1080     | 8q21         |
| <i>POLR3E</i>  | RNA polymerase III subunit E                                                        | 30347    | 16p12.2      |
| <i>POLR3F</i>  | RNA polymerase III subunit F                                                        | 15763    | 20p11.23     |
| <i>POLR3G</i>  | RNA polymerase III subunit G                                                        | 30075    | 5q14.3       |
| <i>POLR3H</i>  | RNA polymerase III subunit H                                                        | 30349    | 22q13.2      |
| <i>POLR3GL</i> | RNA polymerase III subunit G like                                                   | 28466    | 1q21.1       |
| <i>POLR3K</i>  | RNA polymerase III subunit K                                                        | 14121    | 16p13.3      |
| <i>PRKDC</i>   | Protein kinase, DNA-activated, catalytic polypeptide                                | 9413     | 8q11         |
| <i>PYCARD</i>  | PYD and CARD domain containing                                                      | 16608    | 16p11.2      |
| <i>RELA</i>    | RELA proto-oncogene, NF-kB subunit                                                  | 9955     | 11q13        |
| <i>RHBDF2</i>  | Rhomboid 5 homolog 2 (iRhom2)                                                       | 20788    | 17q25.1      |

|                 |                                                                                  |       |              |
|-----------------|----------------------------------------------------------------------------------|-------|--------------|
| <i>RIPK1</i>    | Receptor (TNFRSF)-interacting serine-threonine kinase 1                          | 10019 | 6p25.2       |
| <i>RIPK3</i>    | Receptor-interacting serine-threonine kinase 3                                   | 10021 | 14q12        |
| <i>RNaseH2A</i> | ribonuclease H2 subunit A                                                        | 18518 | 19p13.2      |
| <i>RNaseH2B</i> | ribonuclease H2 subunit B                                                        | 25671 | 13q14.3      |
| <i>RNaseH2C</i> | ribonuclease H2 subunit C                                                        | 24116 | 11q13.1      |
| <i>RNASEL</i>   | Ribonuclease L                                                                   | 6041  | 1q25         |
| <i>RNF135</i>   | Ring Finger protein 135                                                          | 21158 | 17q11.2      |
| <i>RTP4</i>     | receptor transporter protein 4                                                   | 23992 | 3q27.3       |
| <i>SAMHD1</i>   | SAM and HD domain containing deoxynucleoside triphosphate triphosphohydrolase 1  | 15925 | 20pter-q12   |
| <i>STAT1</i>    | Signal transducer and activator of transcription 1, 91kDa                        | 11362 | 2q32.2-q32.3 |
| <i>STAT2</i>    | Signal transducer and activator of transcription 2                               | 11363 | 12q13.3      |
| <i>STAT3</i>    | Signal transducer and activator of transcription 3 (acute-phase response factor) | 11364 | 17q21        |
| <i>STAT4</i>    | Signal transducer and activator of transcription 4                               | 11365 | 2q32.2-q32.3 |
| <i>STAT5A</i>   | Signal transducer and activator of transcription 5A                              | 11366 | 17q11.2      |
| <i>STAT5B</i>   | signal transducer and activator of transcription 5B                              | 11367 | 17q11.2      |
| <i>TANK</i>     | TRAF family member-associated NFkB activator                                     | 11562 | 2q24-q31     |
| <i>TBK1</i>     | TANK-binding kinase 1                                                            | 11584 | 12q14.2      |
| <i>TICAM1</i>   | Toll-like receptor adaptor molecule 1 (TRIF)                                     | 18348 | 19p13.3      |
| <i>TICAM2</i>   | Toll-like receptor adaptor molecule 2 (TRIF)                                     | 21354 | 5q23.1       |
| <i>TIRAP</i>    | Toll-interleukin 1 receptor (TIR) domain containing adaptor protein              | 17192 | 11q24.2      |
| <i>TLR2</i>     | Toll-like receptor 2                                                             | 11848 | 4q32         |
| <i>TLR3</i>     | Toll-like receptor 3                                                             | 11849 | 4q35         |
| <i>TLR4</i>     | Toll-like receptor 4                                                             | 11850 | 9q33.1       |
| <i>TLR7</i>     | Toll-like receptor 7                                                             | 15631 | Xp22.3       |
| <i>TLR8</i>     | Toll-like receptor 8                                                             | 15632 | Xp22         |
| <i>TLR9</i>     | Toll-like receptor 9                                                             | 15633 | 3p21.3       |
| <i>TMEM173</i>  | Transmembrane protein 173 (STING)                                                | 27962 | 5q31.2       |
| <i>TRAF3</i>    | TNF receptor-associated factor 3                                                 | 12033 | 14q32.32     |
| <i>TRAF6</i>    | TNF receptor-associated factor 6, E3 ubiquitin protein ligase                    | 12036 | 11p12        |
| <i>TRIM5</i>    | Tripartite motif containing 5                                                    | 16276 | 11p15        |
| <i>TRIM19</i>   | Tripartite motif containing 19                                                   | 9113  | 15q22        |
| <i>TRIM21</i>   | Tripartite motif containing 21                                                   | 11312 | 11p15.5      |
| <i>TRIM22</i>   | Tripartite motif containing 22                                                   | 16367 | 11p15        |
| <i>TRIM25</i>   | Tripartite motif containing 25                                                   | 12932 | 17q23.2      |
| <i>TRIM32</i>   | Tripartite motif containing 32                                                   | 16380 | 9q33.1       |
| <i>TRIM56</i>   | Tripartite motif containing 56                                                   | 19028 | 7q22.1       |

|                |                                                     |       |          |
|----------------|-----------------------------------------------------|-------|----------|
| <i>TREX1</i>   | Three prime repair exonuclease 1                    | 12269 | 3p21.31  |
| <i>TYK2</i>    | Tyrosine kinase 2                                   | 12440 | 19p13.2  |
| <i>UNC93B1</i> | Unc-93 homolog B1 (C. elegans)                      | 13481 | 11q13.2  |
| <i>VPS45</i>   | Vacuolar protein sorting 45 homolog (S. cerevisiae) | 14579 | 1q21.2   |
| <i>XIAP</i>    | X-linked inhibitor of apoptosis                     | 592   | Xq25     |
| <i>XRCC5</i>   | X-ray repair cross complementing 5                  | 12833 | 2q35     |
| <i>XRCC6</i>   | X-ray repair cross complementing 6                  | 4055  | 22q13.2  |
| <i>ZBP1</i>    | Z-DNA binding protein 1                             | 16176 | 20q13.31 |
| <i>ZDHHC1</i>  | Zinc Finger DHHC-Type Containing 1                  | 17916 | 16q22.1  |

---

**Supplemental Table 2. Enrichment of rare POLR3A, POLR3C variations in severe acute VZV infection cohort**

|                           | VZV cohort<br>(21 individuals) | Control cohort<br>(3724 individuals) | VZV vs Control<br><i>p-value</i> |
|---------------------------|--------------------------------|--------------------------------------|----------------------------------|
| <b>POLR3A</b>             | 3                              | 54                                   | 0.0020                           |
| <b>POLR3C</b>             | 2                              | 14                                   | 0.0046                           |
| <b>POLR3A or POLR3C</b>   | 4                              | 68                                   | 0.00036                          |
| <b>POLR3A and POLR3C*</b> | 2                              | 4                                    | 0.0012                           |

Notes:

1. Ethnic origin of the whole-exome/genome-sequenced individuals, from the VZV cohort or from Control cohort, has been assessed by principal component analysis (PCA) using their exome data. The VZV cohort contains 14 Caucasians, 4 North Africans, 1 African, and 2 Americans. The Control cohort was constructed by including individuals from the Human Genetics of Infectious Diseases (HGID) lab no-viral infection cohorts and from the 1000Genome database <sup>(1)</sup>.
2. The 'Control cohort' consists of 1220 individuals from the no-viral infection cohorts of the HGID lab, and 2504 individuals from the 1000Genome project. Total number of individuals in the cohort of severe acute VZV infection or the Control cohort is indicated under the name of each cohort.
3. Under a POLR3A or POLR3C monogenic model, rare alleles with a MAF<0.0001 in ExAC, and with a CADD score higher than predicted Mutational Significance Cut-off of 95% confidence (13.910 for *POLR3A*, 11.066 for *POLR3C*) were considered in the test. Under a POLR3A and POLR3C digenic model\*, rare alleles with a MAF<0.01 in ExAC, and with a CADD score higher than predicted Mutational Significance Cut-off of 95% confidence were considered in the test.
4. Number of individuals from VZV cohort or Control cohort who harbor rare *POLR3A* or *POLR3C* variations is listed in the table.
5. Ethnic-adjusted *POLR3A* and/or *POLR3C* mutation enrichment assessment was performed using logistic regression adjusting on the three first components of the PCA.

Reference:

Genomes Project, C., Auton, A., Brooks, L.D., Durbin, R.M., Garrison, E.P., Kang, H.M., Korbel, J.O., Marchini, J.L., McCarthy, S., McVean, G.A., et al. 2015. A global reference for human genetic variation. *Nature* 526:68-74.

**Supplemental Table 3. Clinical data**

| Patient # (sex, age) | Clinical presentation                                                                                     | Paraclinical findings                                                                                                      | MR/EEG findings                                                  | Diagnosis and treatment                                                                                     |
|----------------------|-----------------------------------------------------------------------------------------------------------|----------------------------------------------------------------------------------------------------------------------------|------------------------------------------------------------------|-------------------------------------------------------------------------------------------------------------|
| 1 (M, 3 years)       | - Fever<br>- Convulsions, day 6<br>- Loss of consciousness<br>- Hypertonia<br>- Anisocoria<br>- Meningism | - VZV PCR (CSF <sup>1</sup> ), + <sup>2</sup><br>- WBC <sup>3</sup> , 50 cells/μl<br>- Glucose and protein, N <sup>4</sup> | - Brain CAT <sup>7</sup> , N<br>- MRI (4 mo), N<br>- EEG, slowed | Encephalitis<br>Acyclovir 330 mg x3 i.v. for 21 days<br>Day 14: methylprednisolone pulse therapy for 3 days |
| 2 (M, 5 years )      | - Ataxia and nystagmus during chickenpox<br>- Chickenpox twice                                            | - VZV PCR (CSF), ÷ <sup>5</sup>                                                                                            | MRI: Arnold-Chiari type I with tonsillar herniation              | Cerebellitis                                                                                                |
| 3 (M, 5 years)       | - diffuse necrotic varicella<br>- severe pneumonia                                                        | VZV PCR (TSM) <sup>6</sup> , +                                                                                             |                                                                  | Pneumonitis<br>ECMO support needed                                                                          |
| 4 (F, 11 years)      | - bitemporo-frontal acute headache<br>- varicella at 6 years old                                          | - VZV PCR (CSF), +                                                                                                         |                                                                  | Encephalitis                                                                                                |

<sup>1</sup> CSF, *Cerebrospinal fluid*

<sup>2</sup> +, *positive*; ÷, *negative*

<sup>3</sup> WBC, *White blood cells*

<sup>4</sup> N, *Normal*

<sup>5</sup> It has been reported that only a minority of patients with VZV cerebellitis harbor detectable levels of viral DNA in the CSF (1). Therefore, since the onset and resolution of the clinical symptoms of cerebellitis coincided with the chickenpox, it was considered highly likely that VZV was the cause of the CNS symptoms.

<sup>6</sup> Tracheal suction material

<sup>7</sup> CAT, *Computed Axial Tomography*; MRI, *Magnetic resonance imaging*; EEG, *Electroencephalography*

1. Rack, A.L. *et al.* Neurologic varicella complications before routine immunization in Germany. *Pediatr. Neurol.* **42**, 40-48 (2010).

**Supplemental Table 4. Immunophenotyping of available patient blood cells**

|                       | <b>P1</b>                      | <b>P2</b>                      | <b>VZV patient</b><br>(no POL III mutation) | <b>Normal range</b>               |
|-----------------------|--------------------------------|--------------------------------|---------------------------------------------|-----------------------------------|
| <b>Hematology</b>     |                                |                                |                                             |                                   |
| Neutrophils           | 3.96 x 10 <sup>9</sup> cells/L | 6.43 x 10 <sup>9</sup> cells/L | 2.57 x 10 <sup>9</sup> cells/L              | 1.8-8.0 x 10 <sup>9</sup> cells/L |
| Lymphocytes           | 2.86 x 10 <sup>9</sup> cells/L | 2.72 x 10 <sup>9</sup> cells/L | 3.05 x 10 <sup>9</sup> cells/L              | 1.2-6.5 x 10 <sup>9</sup> cells/L |
| Monocytes             | 0.96 x 10 <sup>9</sup> cells/L | 0.73 x 10 <sup>9</sup> cells/L | 0.64 x 10 <sup>9</sup> cells/L              | 0.1-0.8 x 10 <sup>9</sup> cells/L |
| Eosinophils           | 0.13 x 10 <sup>9</sup> cells/L | 0.19 x 10 <sup>9</sup> cells/L | 0.75 x 10 <sup>9</sup> cells/L              | 0-0.5 x 10 <sup>9</sup> cells/L   |
| Basophils             | 0.03 x 10 <sup>9</sup> cells/L | 0.03 x 10 <sup>9</sup> cells/L | 0.02 x 10 <sup>9</sup> cells/L              | 0.02-0.1x10 <sup>9</sup> cells/L  |
| <b>Flow cytometry</b> |                                |                                |                                             |                                   |
| <i>T cells</i>        |                                |                                |                                             |                                   |
| CD3+                  | 1945 cells /μL                 | 1706 cells /μL                 | 1937 cells /μL                              | 700-4200 cells /μL                |
| CD3+CD4+              | 826 cells /μL                  | 1100 cells /μL                 | 1075 cells /μL                              | 300-2000 cells /μL                |
| CD3+CD8+              | 889 cells /μL                  | 491 cells /μL                  | 692 cells /μL                               | 300-1800 cells /μL                |
| CD4+/CD8+             | 0.93                           | 2.24                           | 1.55                                        | 0.9 – 2.6                         |
| <i>NK cells</i>       |                                |                                |                                             |                                   |
| CD16+CD56+CD3÷        | 191 cells /μL                  | 593 cells /μL                  | 485 cells /μL                               | 90-900 cells /μL                  |
| <i>B cells</i>        |                                |                                |                                             |                                   |
| CD19+                 | 167 cells /μL                  | 462 cells /μL                  | 492 cells /μL                               | 200-1600 cells /μL                |
| Kappa                 | 53.7% of CD19+                 | NA                             | 66.9% of CD19+                              |                                   |
| Lambda                | 46.3% of CD19+                 | NA                             | 33.2% of CD19+                              |                                   |
| Kappa/Lambda          | 1.16                           | NA                             | 2.02                                        | 0.26 - 1.65                       |
| CD10                  | 0.5% of CD19+                  | NA                             | 0.9% of CD19+                               |                                   |
| <i>Plasma cells</i>   |                                |                                |                                             |                                   |
| CD38++                | 0.2%                           | NA                             | 0.1%                                        |                                   |
| <i>Granulocytes</i>   | 55.4%                          | 65.1%                          | 65.1%                                       | 35-80%                            |

NA, information no available

**Supplemental Table 5. Structural characteristics of the POL III mutations**

| <b>Patient, mutation</b> | <b>Localization</b>                          | <b>Comments</b>                                                             |
|--------------------------|----------------------------------------------|-----------------------------------------------------------------------------|
| P1, POLR3C L11F          | Relatively buried in the core of the protein | May alter the local or general folding of POLR3C                            |
| P2, POLR3A M307V         | At the interface between POLR3A and POLR3C   | May perturb the interaction with POLR3C and its partners, POLR3F and POLR3G |
| P3, POLR3A Q707R         | Exposed to the solvent                       | May perturb the interaction with associated factors                         |
| P3, POLR3C R438G         | At the interface with POLR3F                 | May alter the POLR3C-POLR3F interaction                                     |
| P4, POLR3A R437Q         | Exposed to the solvent                       | May perturb the interaction with associated factors                         |
| P4, POLR3C R84Q          | Buried in the core of the protein            | May alter folding of POLR3C                                                 |

**Supplemental Table 6. Summary of phenotypes in PBMCs**

| Patient | Genotype                      | Poly(dA:dT)    |             |                      |               | VZV          |              |                |              |
|---------|-------------------------------|----------------|-------------|----------------------|---------------|--------------|--------------|----------------|--------------|
|         |                               | <i>IFNA2</i>   | <i>IFNB</i> | <i>IFNL1</i>         | <i>CXCL10</i> | <i>IFNA2</i> | <i>IFNL1</i> | <i>CXCL10</i>  | <i>Orf63</i> |
| P1      | POLR3C L11F                   | R <sup>1</sup> | R           | R, resc <sup>2</sup> | R             | N            | R, resc      | R <sup>3</sup> | E, resc      |
| P2      | POLR3A M307V                  | R              | R           | R                    | R             | N            | N            | N              | N            |
| P3      | POLR3A Q707R,<br>POLR3C R438Q | R              | R           | R, resc              | R             | R            | R, resc      | R              | E, resc      |
| P4      | POLR3A R437Q<br>POLR3C R84Q   | R              | R           | R                    | R             | R            | R            | R              | E            |

<sup>1</sup> R, reduced compared to controls; N, normal; E, elevated compared to controls

<sup>2</sup> resc, rescue of phenotype by transduction with wildtype allele

<sup>3</sup> VZV-infected PBMCs from P3 displayed reduced expression of a panel of IFN-stimulated genes compared to controls
